# Supplementary material for: Endonuclease IV cleaves apurinic/apyrimidinic sites in single-stranded DNA and its application for biosensing
Source: Royal Society of Chemistry journal article supplement (doi:10.1039/c6an00738d), 2016-01-01
Supplement: c6an00738d1.pdf [file c6an00738d1.pdf]

Electronic Supplementary Material (ESI) for Chemical Communications  
This journal is © The Royal Society of Chemistry 2013

## Supporting Information

### **Endonuclease IV cleaves apurinic/apyrimidinic sites in single-stranded DNA and its application for biosensing**

**Xiang-Juan Kong, Shuang Wu, Yao Cen, Ting-Ting Chen,\* Ru-Qin Yu and Xia  
Chu\***

*State Key Laboratory of Chemo/Bio-Sensing and Chemometrics, College of Chemistry  
and Chemical Engineering, Hunan University, Changsha 410082, P. R. China*

*E-mail: xiachu@hnu.edu.cn; chenting1104@hnu.edu.cn*

**Table 1. Sequences of all DNA molecules used in this research<sup>a</sup>**

---

| Name                | Sequences(5'-3')                                             |
|---------------------|--------------------------------------------------------------|
| Linear probe        | CCATGCAGTCAGTGAGTGNCAATGGCG ddC                              |
| Control probe       | CCATGCAGTCAGTGAGTGTCAATGGCG ddC                              |
|                     | p-                                                           |
| Padlock probe       | TGTCTTCGTCTGCACTCACTGACTATAACAATCTACT<br>ACCTCAACTCTCGCTCTAC |
| Linear probe-C      | CCATGCAGTCAGTGAGTCNCAATGGCG ddC                              |
| Linear probe-A      | CCATGCAGTCAGTGAGTANCAATGGCG ddC                              |
| Linear probe-T      | CCATGCAGTCAGTGAGTTNCAATGGCG ddC                              |
|                     | p-                                                           |
| Padlock probe-C     | TGTCTTCGTCTGGACTCACTGACTATAACAATCTACT<br>ACCTCAACTCTCGCTCTAC |
|                     | p-                                                           |
| Padlock probe-A     | TGTCTTCGTCTGTACTCACTGACTATAACAATCTACT<br>ACCTCAACTCTCGCTCTAC |
|                     | p-                                                           |
| Padlock probe-T     | TGTCTTCGTCTGAACTCACTGACTATAACAATCTACT<br>ACCTCAACTCTCGCTCTAC |
| Ligation probe      | CAGACGAAGACAGTAGAGCGAGA                                      |
| Complementary probe | GCGCCATTGACACTCACT                                           |
| Biotin-DNA          | CAT GCA GTC AGT GAG TGN CTT TAC TTT TTT<br>TTT TTT TT-biotin |
| Signal probe        | ATACAAT(FAM)CTACT(Dabcyl)ACCTCAAC                            |

---

<sup>a</sup> N is the tetrahydrofuran abasic site mimic, ddC is 2',3'-dideoxycytidine. The signal probes were the fluorescence-quenched probe with 4-(4-dimethylaminophenyl) diazenylbenzoic acid (Dabcyl) quencher and fluorescein (FAM) fluorophore.

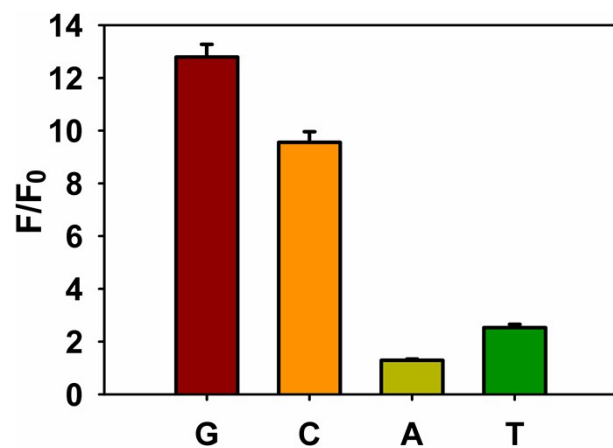

**Fig. S1.** Comparison of the fluorescence intensity ratio of the sensing system to different DNA bases at the 5' side of the AP site. The concentration of Endo IV was fixed at 5 U/mL.

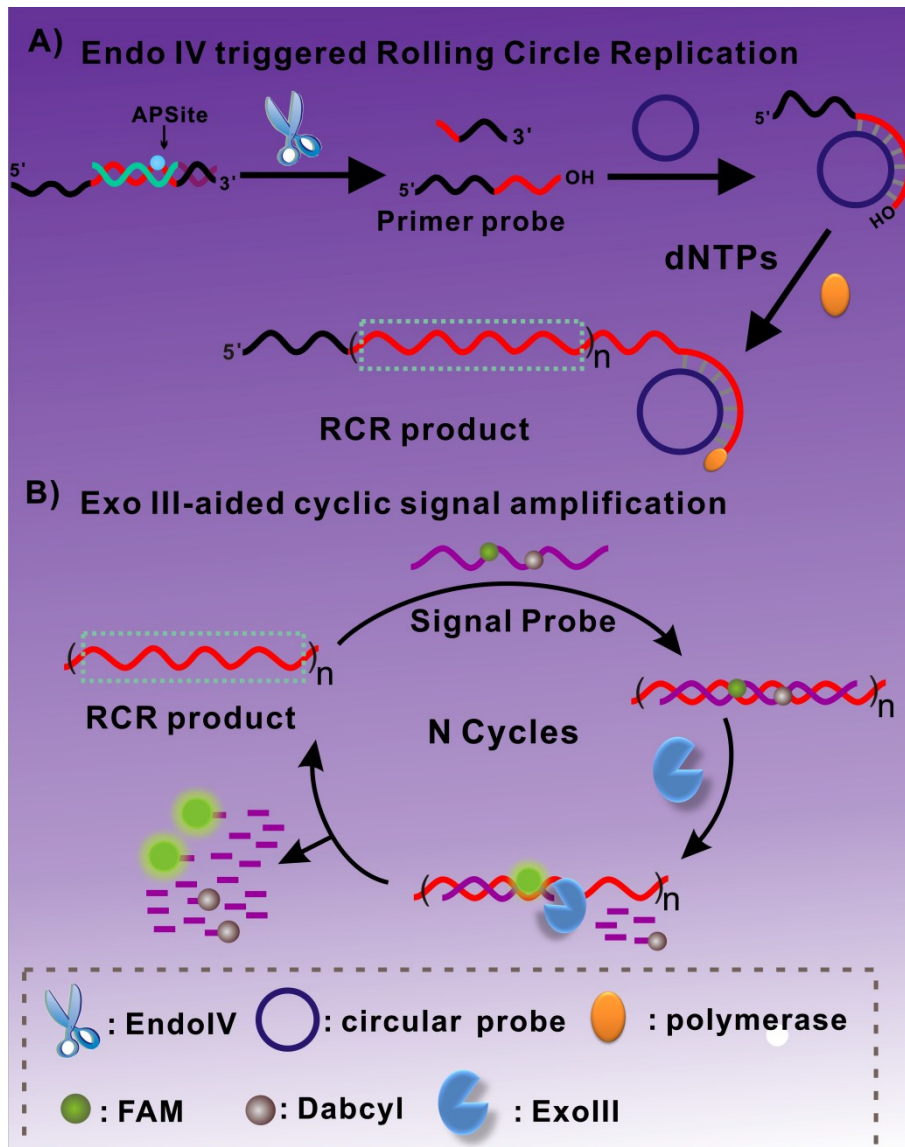

**Fig. S2.** Schematic illustration of Exo III-aided RCR dual signal amplification reaction for Endo IV activity assay to AP sites in dsDNA. A) Endo IV cleaves AP site in the formed AP:A base pair and releases primer probe containing 3' hydroxyl to initiate RCR reaction. B) Exo III-aided cyclic signal amplification reaction.

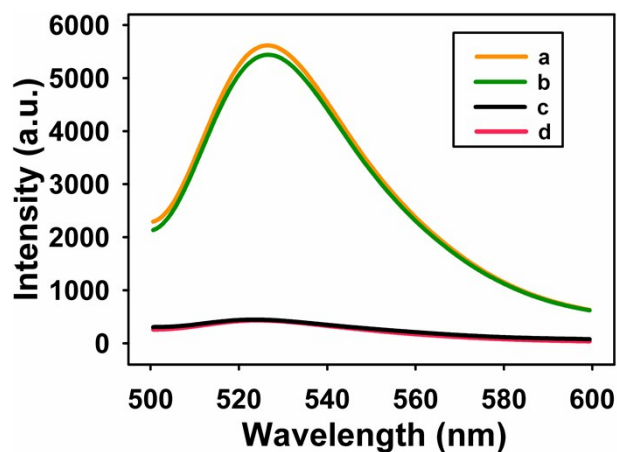

**Fig. S3.** Fluorescence spectra responses of Endo IV cleaving AP sites activity in ssDNA and dsDNA using Exo III-aided RCR dual signal amplification strategy. Curve a, dsDNA (25 nM)+Endo IV(5 U/mL); curve b, ssDNA (25 nM)+Endo IV(5 U/mL); curve c, dsDNA (25 nM); curve d, ssDNA (25 nM).

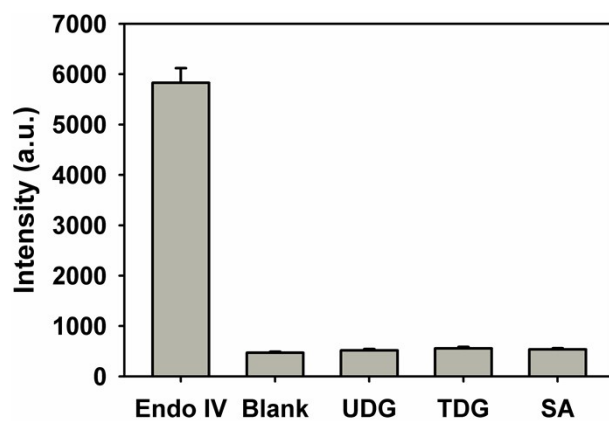

**Fig. S4** Specificity evaluation of the strategy for Endo IV detection. Conditions: Endo IV, 5 U/mL; SA, 0.05  $\mu$ M; TDG and UDG, 10 U/mL. Error bars are standard deviation of three repetitive experiments.

**Table S2. Recovery detection of Endo IV activity in diluted HeLa cell lysate.<sup>a</sup>**

---

| Samples added(U/mL) | found(U/mL) | recovery | RSD(n=3) |      |
|---------------------|-------------|----------|----------|------|
| 1                   | 0.1         | 0.105    | 105%     | 3.2% |
| 2                   | 0.3         | 0.306    | 102%     | 4.5% |
| 3                   | 0.5         | 0.476    | 95.2%    | 4.9% |
| 4                   | 0.8         | 0.793    | 99.1%    | 3.1% |

---

<sup>a</sup>The concentration of the cell line was  $1 \times 10^4$  cells/mL.

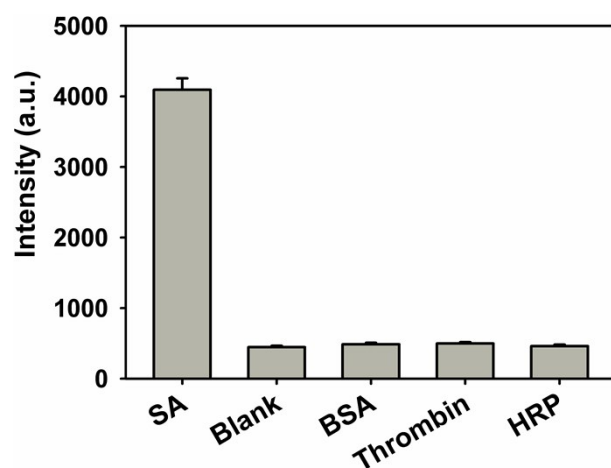

**Fig. S5** Specificity evaluation of the strategy for SA detection. Conditions: SA, 1 nM; BSA, Thrombin and HRP, 10 nM. Error bars are standard deviation of three repetitive experiments.



**Table S3. Comparison of different analytical methods for SA detection sensitivity by our strategy and those reported in literature**

---

| Analytical Method                                                             | Detection Limit (pM) | Ref.      |
|-------------------------------------------------------------------------------|----------------------|-----------|
| Label-free fluorescent method using SYBR Green I without amplification        | 100                  | 1         |
| Poly T templated Cu NPs based fluorescent biosensor without amplification     | 100                  | 2         |
| Dual-color fluorescent biosensor without amplification                        | 138                  | 3         |
| Solid-state Ag/AgCl process based amplified electrochemical assay             | 10                   | 4         |
| Endo IV-mediated signal amplification coupled with rolling circle replication | 2.5                  | This work |

---

**Table S4. Recovery detection of SA in 2% human sera samples**

---

| Samples | added(nM) | found(nM) | recovery | RSD(n=3) |
|---------|-----------|-----------|----------|----------|
| 1       | 0.01      | 0.093     | 93%      | 3.7%     |
| 2       | 0.05      | 0.052     | 104%     | 2.9%     |
| 3       | 0.1       | 0.097     | 97%      | 4.6%     |
| 4       | 0.5       | 0.497     | 99.4%    | 3.2%     |

---

## References

1. Z. Wu, H. Q. Wang, M. Gou, L. J. Tang, R. Q. Yu and J. H. Jiang, *Anal. Chem.*, 2011, **83**, 3104-3111.
2. H. B. Wang, H. D. Zhang, Y. Chen and Y. M. Liu, *Biosens.Bioelectron.*, 2015, **74**, 581-586.
3. C. H. Chen, X. Xiang, Y. F. Liu, G. H. Zhou, X. H. Ji and Z. K. He, *Biosens.Bioelectron.*, 2014, **58**, 205-208.
4. Q. Wang, B. Y. Jiang, J. Xu, J. Q. Xie, Y. Xiang, R. Yuan and Y. Q. Chai, *Biosens.Bioelectron.*, 2013, **43**, 19-24.
